# Supplementary material
Source: publisher figshare collection journal article supplement (https://acs.figshare.com/ndownloader/files/5122885)
Supplement: Supplementary file 1 [file 5122885]

## Supporting Information (S1)

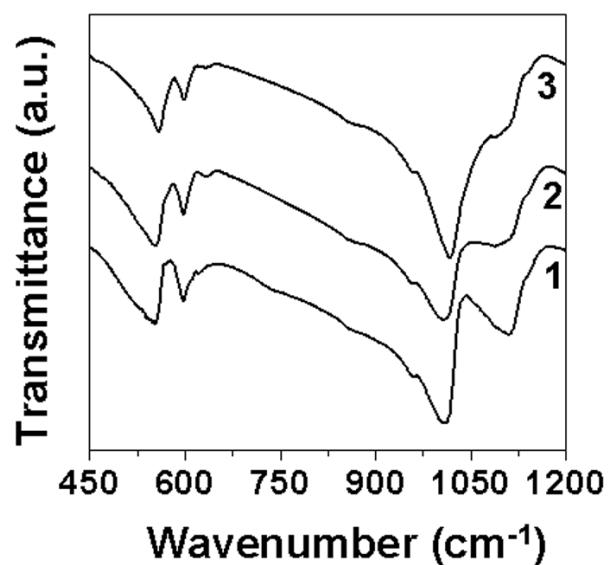

**S1.** FTIR spectra recorded from drop-coated films on Si (111) wafers of calcium phosphate crystals grown on aspartic acid capped gold nanoparticles (curve 1); calcium phosphate crystals grown on borohydride reduced gold nanoparticles (curve 2) and in the presence of pure aspartic acid (curve 3).
